# Supplementary material for: A rhodamine–quinoline type molecular switch as a highly selective sequential sensor for Al3+and F−in aqueous solution
Source: Royal Society of Chemistry journal article supplement (doi:10.1039/c4ra06473a), 2014-08-26
Supplement: c4ra06473a1.pdf [file c4ra06473a1.pdf]

Supporting information for

## **A rhodamine-quinoline type molecule switch as highly selective sequential sensor for Al<sup>3+</sup> and F<sup>-</sup> in aqueous solution**

Yong-Sheng Mi,<sup>a, b</sup> Dong-Ming Liang,<sup>b</sup> Ya-Ting Chen,<sup>b</sup> Xu-Biao Luo,<sup>\*a</sup> and Jian-Nan Xiang<sup>\*b</sup>

*a Key Laboratory of Jiangxi Province for Persistent Pollutants Control and Resources Recycle, Nanchang Hangkong University Nanchang, Jiangxi 330063, P. R. China.*

*Fax: +86-791-3953007; E-mail: [luoxubiao@126.com](mailto:luoxubiao@126.com).*

*b State Key Laboratory of Chemo/Biosensing and Chemometrics, College of Chemistry and Chemical Engineering, Hunan University, Changsha, 410082, P. R. China.*

*Fax: +86-731-88713642; E-mail: [jnxiang@hnu.edu.cn](mailto:jnxiang@hnu.edu.cn).*

*\*Corresponding author. E-mail: [jnxiang@hnu.edu.cn](mailto:jnxiang@hnu.edu.cn);*

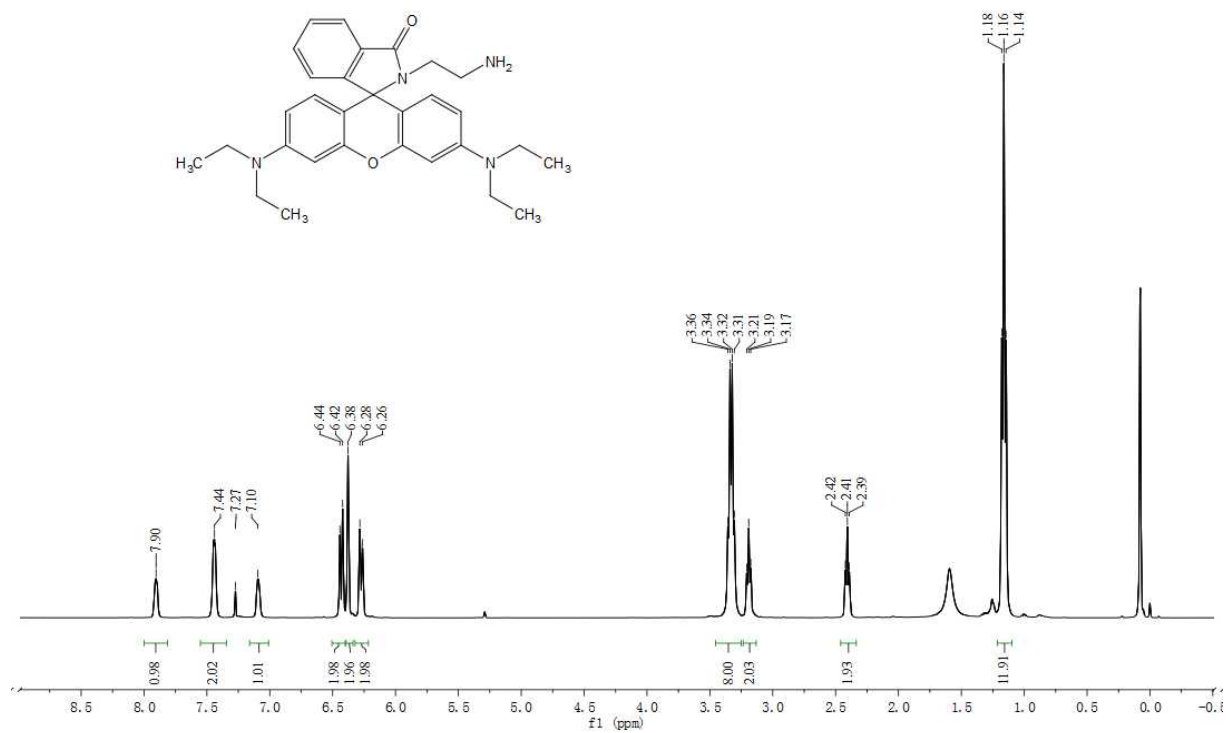

Figure S1. <sup>1</sup>H NMR spectrum of compound **RhB-EDA** in CDCl<sub>3</sub>.

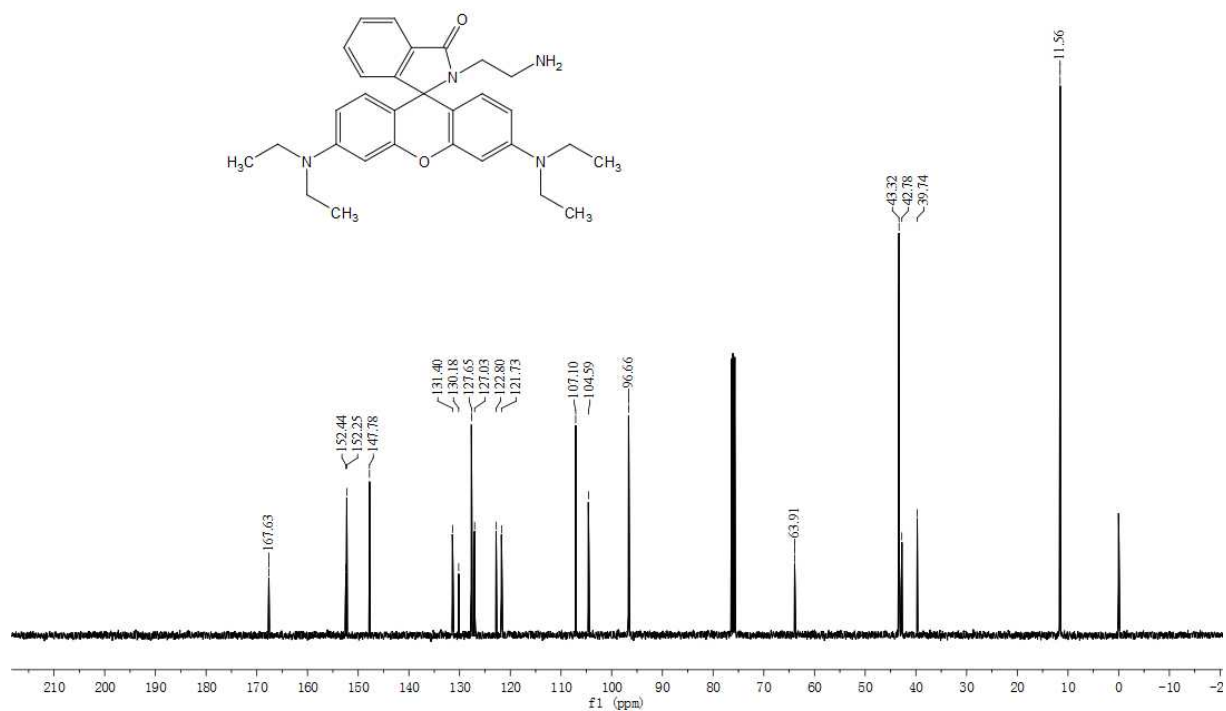

Figure S2. <sup>13</sup>C NMR spectrum of compound **RhB-EDA** in CDCl<sub>3</sub>.

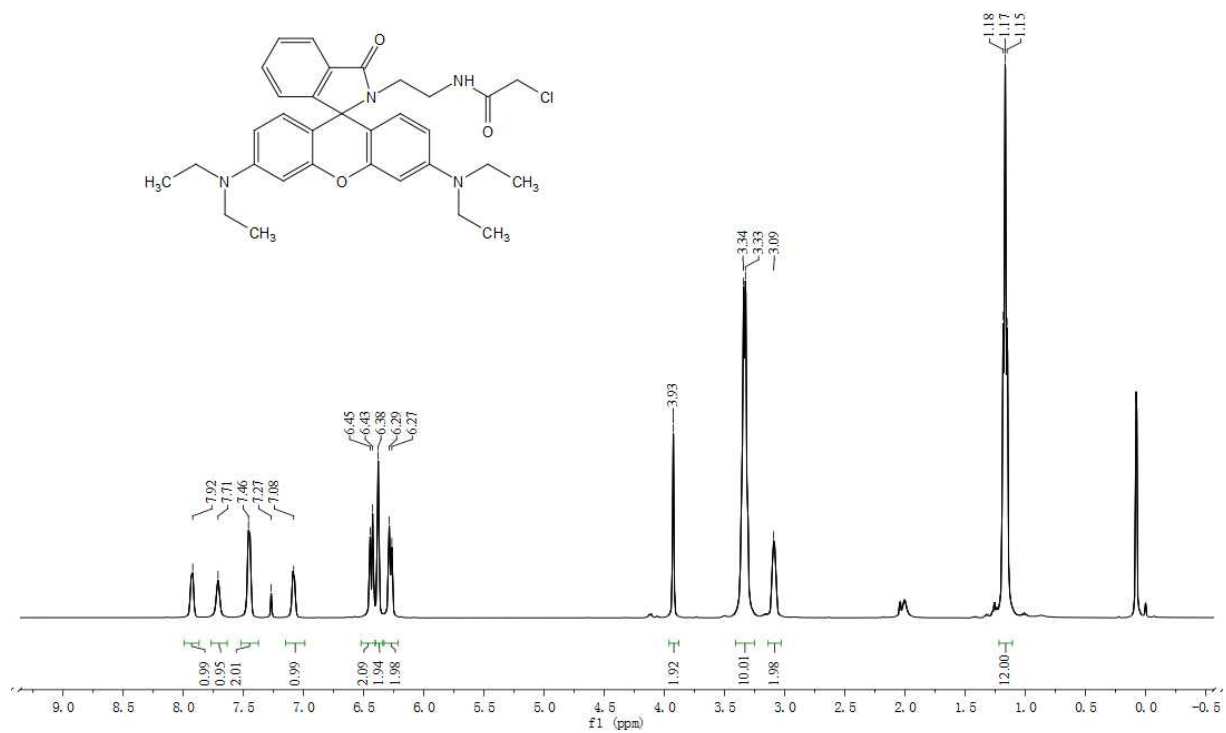

Figure S3.  $^1\text{H}$  NMR spectrum of compound **RhB-EDA-CE** in  $\text{CDCl}_3$ .

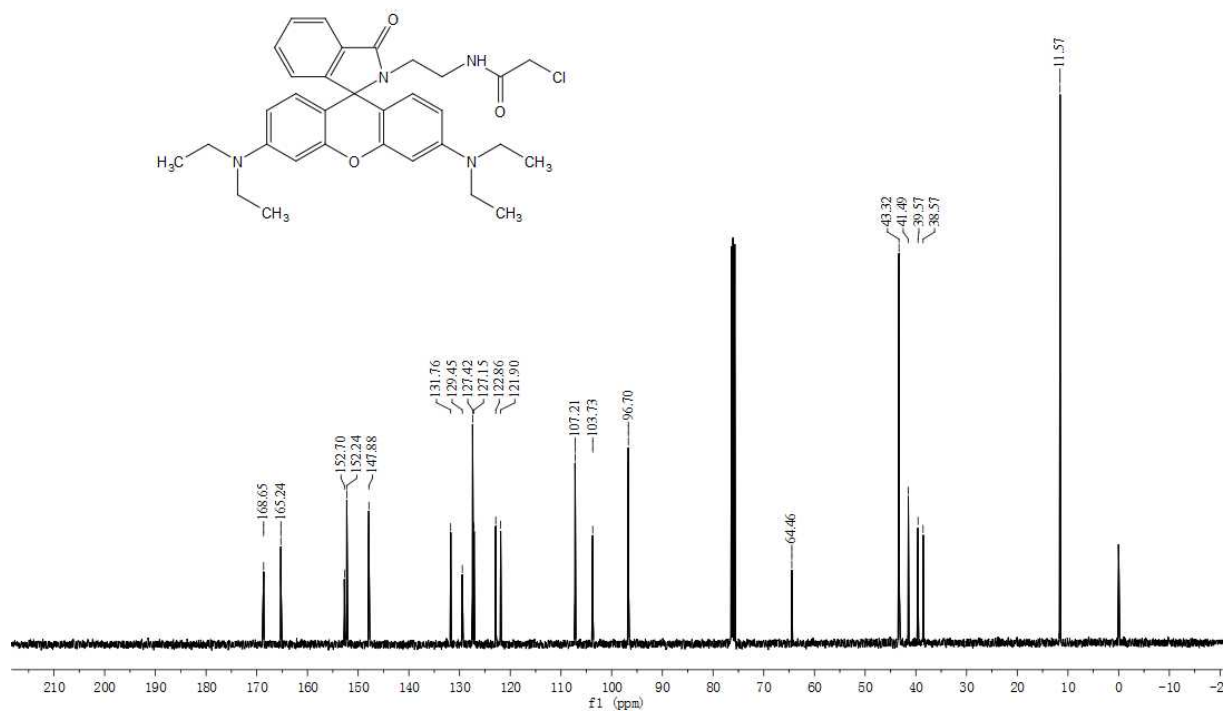

Figure S4.  $^{13}\text{C}$  NMR spectrum of compound **RhB-EDA-CE** in  $\text{CDCl}_3$ .

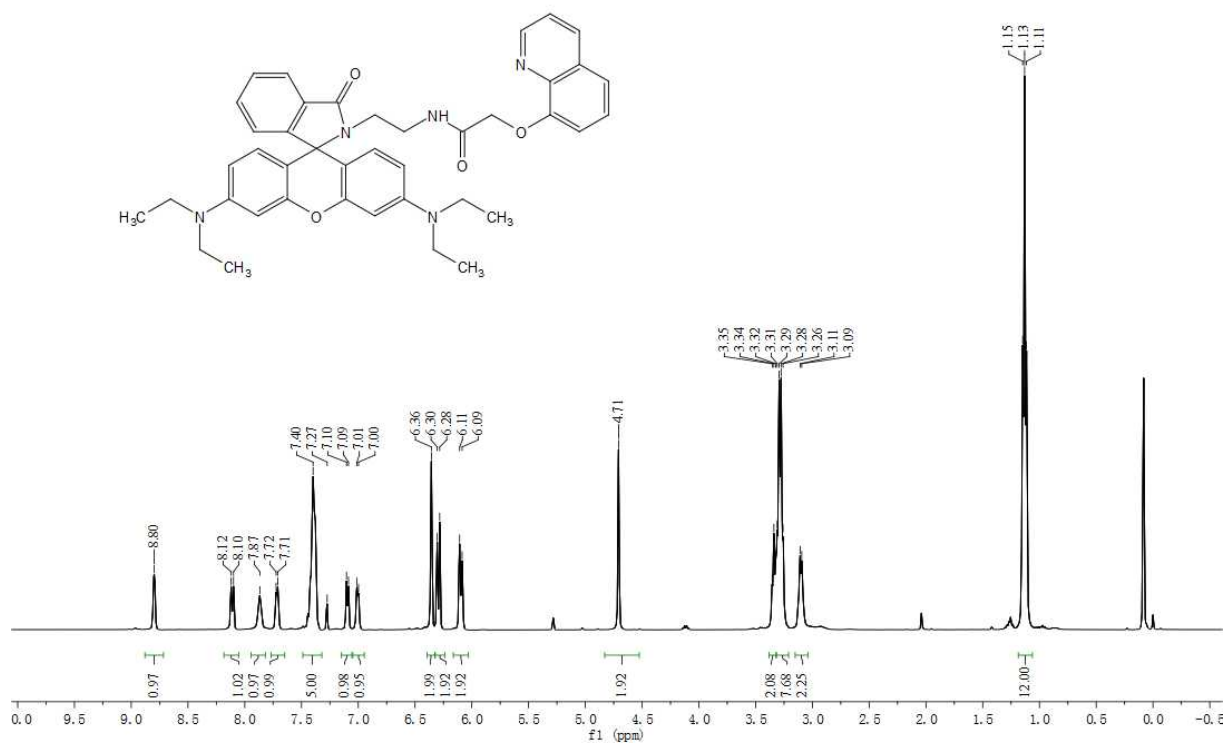

Figure S5.  $^1\text{H}$  NMR spectrum of the probe **REQ** in  $\text{CDCl}_3$ .

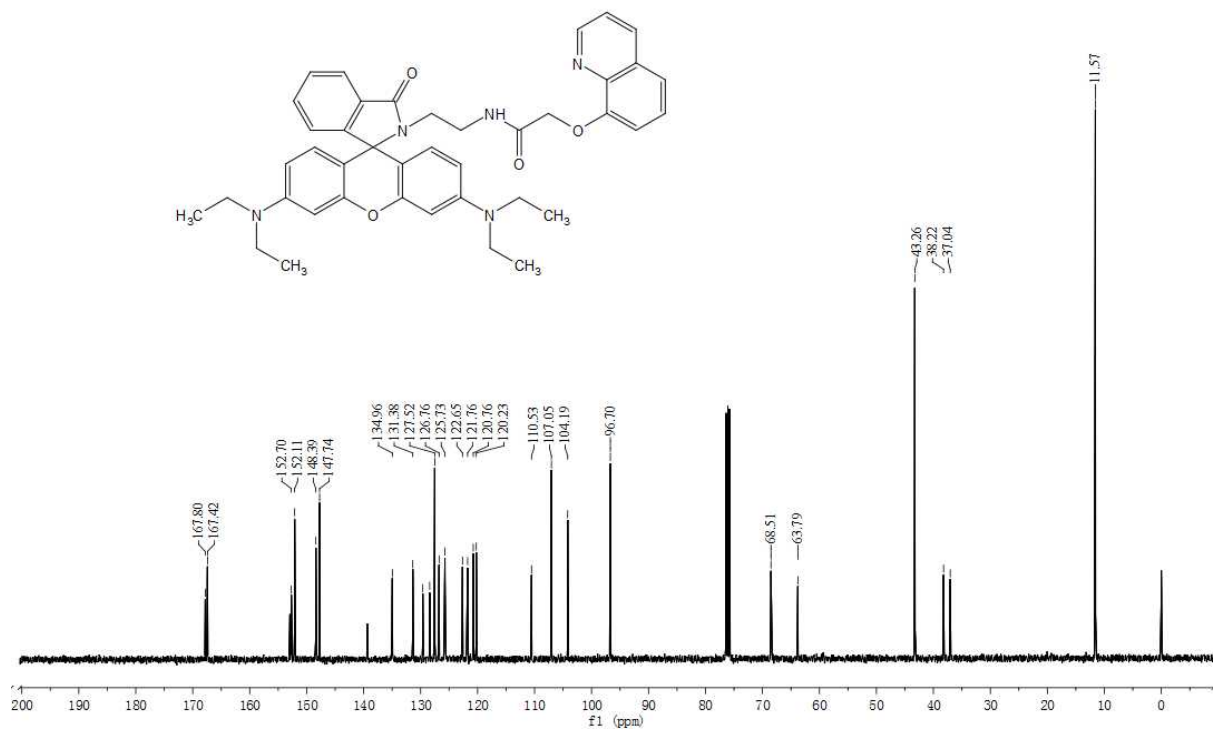

Figure S6.  $^{13}\text{C}$  NMR spectrum of the probe **REQ** in  $\text{CDCl}_3$ .

mysh-140422-rhb #5 RT: 0.99 AV: 1 SB: 1 0.41 NL: 4.43E6  
T: + c EI Full ms [ 49.50-700.50]

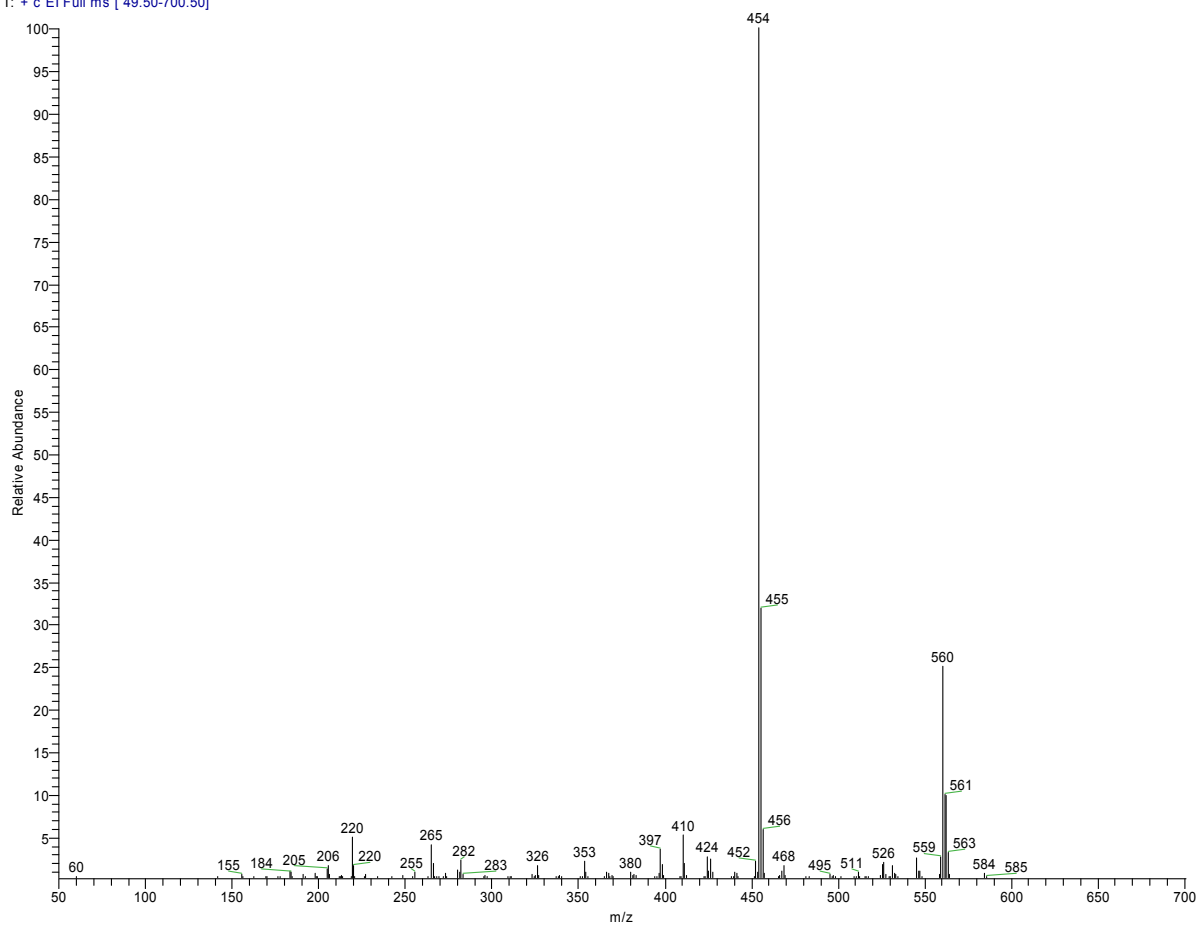

Figure S7. EI-MS of compound **RhB-EDA-CE**.

mysh-140422-req #17 RT: 3.40 AV: 1 NL: 2.88E6  
 T: + c EI Full ms [ 49.50-700.50]

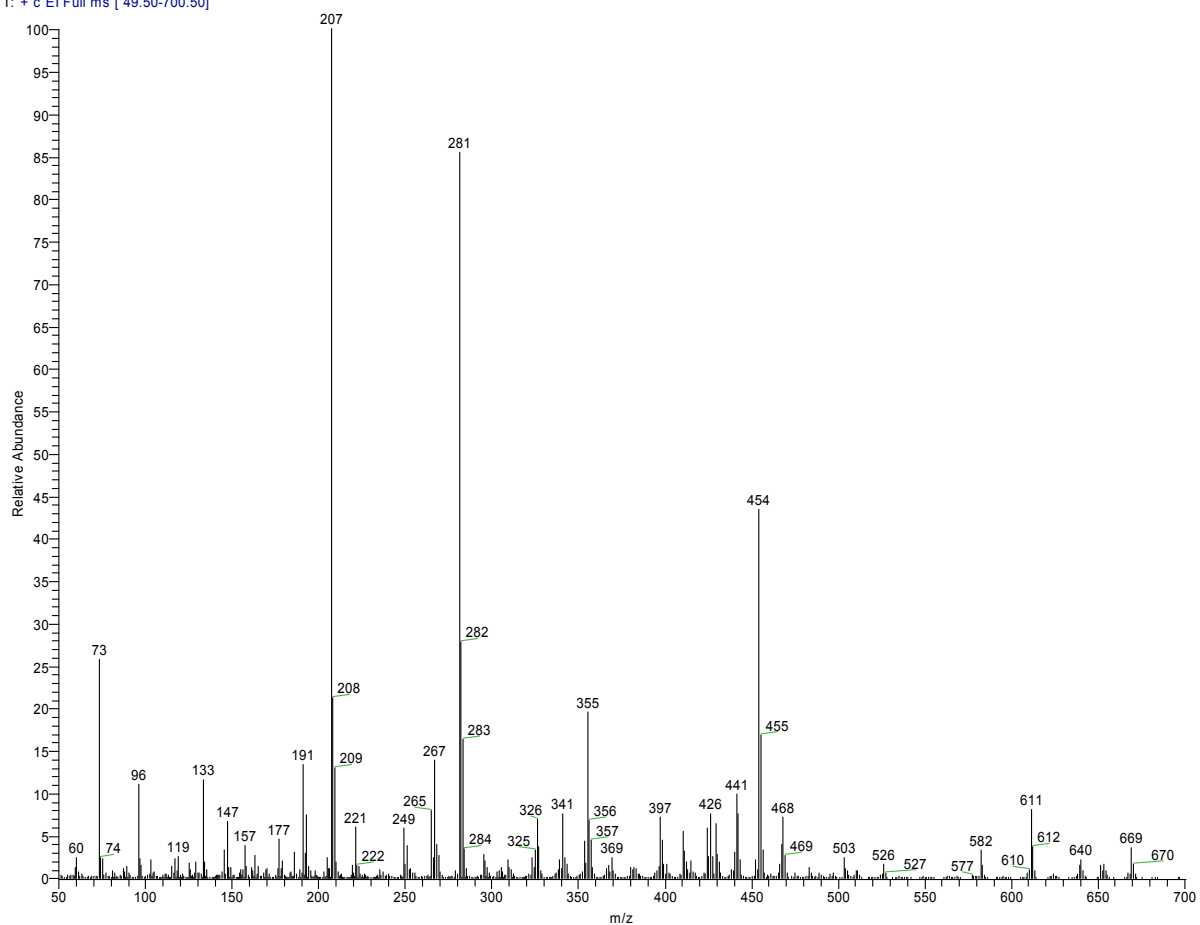

Figure S8. EI-MS of compound **REQ**.

File : D:\Xcalibur\data\mysh-140425-669-hr-av2.RAW  
 Full ms [663.500 - 684.500] - Range: 663.500 - 684.500  
 Scan No. 1 of 1

| Mass     | Relative Intensity | Theoretical Mass | Delta [ppm] | Delta [mmu] | Composition                                                   |
|----------|--------------------|------------------|-------------|-------------|---------------------------------------------------------------|
| 669.3300 | 100.0              | 669.3310         | -1.5        | -1.0        | C <sub>41</sub> H <sub>43</sub> O <sub>4</sub> N <sub>5</sub> |
|          |                    | 669.3224         | 11.3        | 7.5         | C <sub>45</sub> H <sub>41</sub> O <sub>2</sub> N <sub>4</sub> |
|          |                    | 669.3435         | -20.3       | -13.6       | C <sub>42</sub> H <sub>45</sub> O <sub>4</sub> N <sub>4</sub> |
|          |                    | 669.3462         | -24.3       | -16.3       | C <sub>45</sub> H <sub>43</sub> O <sub>1</sub> N <sub>5</sub> |
|          |                    | 669.3098         | 30.1        | 20.1        | C <sub>44</sub> H <sub>39</sub> O <sub>2</sub> N <sub>5</sub> |

Figure S9. HRMS(EI) of compound **REQ**.
